# Supplementary material for: Typing of the Gut Microbiota Community in Japanese Subjects
Source: Microorganisms. 2022 Mar 20;10(3):664. doi: 10.3390/microorganisms10030664 (PMC8954045; doi:10.3390/microorganisms10030664)
Supplement: Supplementary file 1 [file microorganisms-10-00664-s001.zip › S20211231Microbiota_Profile_Suppl_ver10.xlsx]

## Sheet: Suppl Table S1
		Supplementary Table S1. Detailed distribution of the enrolled subjects of this study
					N	Male (Age±SD)		Female (Age±SD)
		Total			1803	983	(63.2±16.2)	820	(65.5±13.4)
		Healthy subjescts			283	177	(43.4±11.1)	106	(49.2±12.3)
		Cardiovascular diseases	Ischemic heart diseases		55	44	(73.8±9.1)	11	(74.0±5.5)
			Heart failure		13	10	(78.5±5.9)	3	(69.0±4.6)
			others		36	17	(74.5±6.4)	19	(73.8±7.9)
		Hepatic diseases	Nonalcoholic fatty liver disease (NAFLD)		117	58	(63.9±12.4)	59	(67.2±10.8)
			Alcoholic liver disease		6	5	(61.8±15.1)	1	(55.0)
			Viral liver disease		38	22	(68.8±10.0)	16	(76.3±7.8)
			others		16	9	(59.1±15.8)	7	(64.7±14.6)
		Functional gastrointestinal disorders	Functional Dyspepsia (FD)		14	8	(67.4±15.4)	6	(64.7±12.4)
			irritable bowel syndrome (IBS)		20	16	(61.2±28.4)	4	(60.0±17.8)
			chronic constipation		54	23	(74.8±10.9)	31	(68.6±14.7)
			others		21	14	(67.2±9.4)	7	(71.6±2.0)
		Endocrine diseases	Thyroid dysfunction		17	2	(63.5±2.1)	15	(65.6±6.8)
			others		40	24	(69.4±8.4)	16	(71.8±10.1)
		Neurological diseases	Parkinson's disease		3	2	(74.0±11.3)	1	(77.0)
			others		12	5	(63.8±16.5)	7	(63.6±15.9)
		Psychiatric diseases	Depression		8	6	(58.7±13.2)	2	(74.5±10.6)
			Dementia		4	1	(72.0)	3	(83.3±6.1)
			others		26	12	(68.3±13.8)	14	(68.3±13.9)
		Inflammatory Bowel Diseases (IBD)	Ulcerative colitis		98	53	(51.4±18.5)	45	(52.8±15.6)
			Crohn's disease		30	23	(41.4±16.9)	7	(49.4±16.5)
		Autoimmune diseases	Rheumatoid arthritis		8	3	(72.3±5.5)	5	(62.6±14.7)
			others		13	4	(72.0±11.4)	9	(69.3±10.9)
		Malignant diseases	Esophagus	under treatment	20	17	(64.4±10.8)	3	(66.7±9.5)
				after treatment	26	25	(70.3±10.3)	1	(66.0)
			Stomach	under treatment	40	30	(69.4±8.5)	10	(70.1±7.8)
				after treatment	47	36	(72.3±9.5)	11	(73.0±8.2)
			Duodenum	under treatment	9	5	(68.4±8.0)	4	(72.0±3.2)
				after treatment	7	4	(68.8±9.3)	3	(72.3±3.8)
			Colon	under treatment	13	6	(66.8±11.7)	7	(69.6±3.7)
				after treatment	10	7	(74.7±9.8)	3	(73.0±6.0)
			Liver / Gall Bladder / Pancreas	under treatment	5	4	(69.8±9.3)	1	(64.0)
				after treatment	1	1	(74.0)	0	(-)
			Lung	under treatment	28	16	(73.2±9.1)	12	(71.7±12.3)
				after treatment	20	11	(73.3±8.8)	9	(69.4±8.5)
			Head and Neck	under treatment	0	0	(-)	0	(-)
				after treatment	10	4	(70.5±3.7)	6	(65.3±5.4)
			others	under treatment	12	7	(72.6±9.4)	5	(65.8±11.0)
				after treatment	52	21	(69.8±9.3)	31	(66.3±10.6)
		lifestyle-related diseases	Hypertension		619	313	(70.2±9.8)	306	(70.2±9.1)
			Dyslipidemia		819	422	(68.3±11.4)	397	(69.1±9.9)
			Hyperuricemia		138	99	(68.5±12.4)	39	(72.5±7.9)
			Diabetes		474	268	(67.4±11.3)	206	(66.3±10.7)
			Obesities (BMI ≥ 30 kg/m2)		96	40	(51.2±17.2)	56	(55.2±15.3)
		BMI; body mass index

## Sheet: Suppl Table S2
	Supplementary Table S2. Abundance of bacterial genera in each PAM-identified type
		Type A	Type B	Type C	Type D	Type E
	[Eubacterium]	1.15% ± 2.01%	0.62% ± 1.42%	0.61% ± 1.12%	0.81% ± 1.61%	1.25% ± 1.44%
		ab	c	bc	bc	a
	[Ruminococcus]	1.88% ± 3.06%	3.34% ± 3.28%	3.06% ± 4.19%	2.41% ± 3.86%	1.46% ± 1.60%
		cd	a	b	bc	d
	Actinomyces	0.04% ± 0.07%	0.04% ± 0.05%	0.05% ± 0.09%	0.05% ± 0.07%	0.03% ± 0.05%
		a	a	a	a	a
	Alistipes	0.86% ± 1.14%	0.60% ± 0.82%	0.93% ± 1.59%	0.44% ± 0.73%	0.33% ± 0.42%
		a	bc	ab	d	cd
	Anaerostipes	0.42% ± 0.56%	0.36% ± 0.57%	0.25% ± 0.40%	0.29% ± 0.47%	0.33% ± 0.58%
		a	b	b	b	b
	Anaerotruncus	0.04% ± 0.08%	0.02% ± 0.04%	0.06% ± 0.16%	0.02% ± 0.08%	0.01% ± 0.02%
		a	b	a	c	bc
	Bacteroides	8.19% ± 4.60%	25.32% ± 7.71%	13.72% ± 7.40%	10.35% ± 5.73%	6.36% ± 4.57%
		d	a	b	c	e
	Bifidobacterium	4.11% ± 4.17%	5.79% ± 5.27%	4.54% ± 4.25%	22.27% ± 11.45%	3.39% ± 4.24%
		cd	b	c	a	d
	Bilophila	0.11% ± 0.12%	0.17% ± 0.19%	0.17% ± 0.20%	0.11% ± 0.15%	0.12% ± 0.13%
		b	a	ab	c	ab
	Blautia	4.98% ± 3.07%	6.62% ± 3.95%	4.69% ± 3.24%	4.58% ± 3.14%	3.82% ± 2.19%
		b	a	bc	bc	c
	Butyricicoccus	0.32% ± 0.30%	0.46% ± 0.47%	0.29% ± 0.56%	0.30% ± 0.47%	0.35% ± 0.28%
		bc	a	d	cd	ab
	Butyricimonas	0.12% ± 0.15%	0.08% ± 0.14%	0.10% ± 0.17%	0.05% ± 0.09%	0.07% ± 0.09%
		a	cd	b	d	bc
	Clostridium	1.43% ± 1.81%	1.75% ± 1.83%	2.76% ± 4.67%	1.18% ± 1.62%	0.84% ± 1.67%
		b	a	a	c	d
	Collinsella	2.86% ± 3.02%	1.87% ± 2.74%	2.28% ± 2.84%	3.60% ± 4.06%	2.18% ± 2.25%
		a	c	bc	a	ab
	Coprobacillus	0.08% ± 0.25%	0.08% ± 0.26%	0.11% ± 0.29%	0.09% ± 0.27%	0.02% ± 0.11%
		a	a	a	a	b
	Coprococcus	3.82% ± 2.75%	2.97% ± 2.43%	1.91% ± 1.81%	2.56% ± 2.11%	2.64% ± 2.24%
		a	b	c	b	b
	Dialister	0.64% ± 1.25%	0.48% ± 0.96%	0.45% ± 1.11%	0.49% ± 0.91%	1.23% ± 2.04%
		bc	bc	c	b	a
	Dorea	1.40% ± 1.40%	1.70% ± 1.52%	1.43% ± 1.49%	1.21% ± 1.57%	1.55% ± 0.92%
		b	a	bc	c	a
	Eggerthella	0.06% ± 0.13%	0.10% ± 0.14%	0.14% ± 0.23%	0.15% ± 0.24%	0.02% ± 0.05%
		b	a	a	a	c
	Faecalibacterium	6.31% ± 4.25%	6.53% ± 5.49%	3.33% ± 3.50%	5.80% ± 5.50%	5.85% ± 4.06%
		a	ab	c	b	ab
	Gemmiger	3.52% ± 3.41%	2.24% ± 2.71%	2.31% ± 2.79%	2.46% ± 2.62%	2.00% ± 1.67%
		a	b	b	b	b
	Granulicatella	0.03% ± 0.10%	0.03% ± 0.05%	0.04% ± 0.28%	0.03% ± 0.09%	0.02% ± 0.05%
		b	a	b	b	b
	Holdemania	0.03% ± 0.06%	0.03% ± 0.04%	0.03% ± 0.04%	0.02% ± 0.03%	0.02% ± 0.05%
		a	b	ab	c	bc
	Lachnospira	2.16% ± 2.06%	2.02% ± 2.48%	1.29% ± 2.09%	1.53% ± 2.08%	1.28% ± 1.40%
		a	b	c	bc	bc
	Lactobacillus	0.85% ± 2.88%	0.50% ± 1.84%	0.46% ± 1.59%	3.66% ± 7.61%	0.61% ± 2.42%
		b	c	c	a	bc
	Odoribacter	0.17% ± 0.26%	0.14% ± 0.19%	0.14% ± 0.45%	0.06% ± 0.12%	0.10% ± 0.12%
		a	b	b	c	b
	Oscillospira	3.95% ± 2.62%	1.78% ± 1.39%	2.87% ± 2.46%	1.73% ± 1.65%	1.76% ± 1.59%
		a	c	b	c	c
	Parabacteroides	1.52% ± 1.47%	2.23% ± 2.19%	2.12% ± 2.95%	1.23% ± 1.49%	1.45% ± 1.36%
		b	a	ab	c	b
	Phascolarctobacterium	1.54% ± 1.66%	1.31% ± 1.53%	1.31% ± 1.59%	0.81% ± 1.35%	2.74% ± 3.12%
		b	c	c	d	a
	Prevotella	2.22% ± 3.66%	0.69% ± 2.26%	1.34% ± 3.13%	1.19% ± 3.33%	26.09% ± 9.08%
		b	c	c	c	a
	Roseburia	4.69% ± 6.99%	4.29% ± 4.62%	2.39% ± 3.18%	3.08% ± 3.64%	3.11% ± 2.88%
		a	a	c	bc	ab
	Ruminococcus	6.01% ± 4.20%	2.75% ± 3.34%	6.51% ± 7.19%	3.39% ± 4.40%	2.15% ± 2.69%
		a	b	a	b	b
	Streptococcus	3.70% ± 6.03%	2.66% ± 4.12%	2.56% ± 4.16%	4.24% ± 7.32%	2.52% ± 4.05%
		ab	ab	b	a	b
	Sutterella	0.56% ± 0.47%	1.17% ± 0.99%	0.76% ± 0.76%	0.75% ± 0.74%	0.97% ± 0.69%
		c	a	bc	b	a
	Turicibacter	0.26% ± 0.54%	0.19% ± 0.58%	0.18% ± 0.53%	0.13% ± 0.44%	0.19% ± 0.54%
		a	b	bc	c	abc
	Veillonella	0.31% ± 0.90%	1.10% ± 2.46%	0.51% ± 1.27%	1.35% ± 2.63%	0.55% ± 1.63%
		b	a	b	a	b
	Other genus	4.94% ± 4.11%	4.72% ± 4.83%	18.74% ± 14.84%	6.49% ± 6.11%	10.89% ± 7.97%
		c	d	a	c	b
	Genus unidentified	24.71% ± 9.97%	13.27% ± 5.36%	15.57% ± 6.96%	11.13% ± 5.13%	11.67% ± 5.32%
		a	c	b	d	d
	Statistically signiﬁcant differences are indicated by different letters Statistical differences (p < 0.05) in the relative abundance of bacterial genera among the groups were evaluated using one-way ANOVA with Benjamini-Hochberg corrections.

## Sheet: Suppl Table S3
	Supplementary Table S3. Number and proportion of healthy subjects in each of the 15 DMM model-identified types
		The number of enrolled subjects	The number of healthy subjects	The rate of healthy subjects (%)	Male (Age±SD)		Female (Age±SD)
	Type 1	178	38	21.3483	101	(60.3±17.4)	77	(66.0±13.8)
	Type 2	171	32	18.7135	99	(56.9±18.2)	72	(63.5±13.7)
	Type 3	157	34	21.6561	110	(62.4±16.1)	47	(68.1±13.2)
	Type 4	132	24	18.1818	50	(62.3±18.7)	82	(63.5±14.5)
	Type 5	134	5	3.73134	71	(70.2±12.0)	63	(71.6±7.9)
	Type 6	128	21	16.4062	54	(62.9±15.0)	74	(64.9±11.8)
	Type 7	129	12	9.30233	59	(71.7±9.0)	70	(69.8±9.1)
	Type 8	119	22	18.4874	65	(60.7±15.4)	54	(60.6±13.2)
	Type 9	108	19	17.5926	61	(63.8±14.0)	47	(63.8±15.3)
	Type 10	102	43	42.1569	82	(54.9±15.2)	20	(58.5±17.0)
	Type 11	103	6	5.82524	42	(72.0±14.1)	61	(70.4±11.2)
	Type 12	93	2	2.15054	61	(75.5±6.9)	32	(74.0±5.5)
	Type 13	92	8	8.69565	35	(69.3±8.8)	57	(62.9±12.9)
	Type 14	92	9	9.78261	54	(62.1±16.7)	38	(58.9±14.4)
	Type 15	65	8	12.3077	39	(53.3±19.1)	26	(57.6±18.3)
